# Supplementary material for: Prognostic Genomic Tissue-Based Biomarkers in the Treatment of Localized Prostate Cancer
Source: MDPI journal article supplement (doi:10.3390/jpm12010065), 2022-01-07
Supplement: s1 [file s1]

| Table S1 (Supplemental material). Newcastle Ottawa Scale for risk of bias assessment of the included studies (scores ≥7–9, 4–6, <4 are considered as low, intermediate, and high risk, respectively) |                                       |                          |                           |                              |               |                       |                           |                       |         |
|------------------------------------------------------------------------------------------------------------------------------------------------------------------------------------------------------|---------------------------------------|--------------------------|---------------------------|------------------------------|---------------|-----------------------|---------------------------|-----------------------|---------|
| Study                                                                                                                                                                                                | Selection                             |                          |                           |                              | comparability | Outcome               |                           |                       | overall |
|                                                                                                                                                                                                      | Rappresentativeness of exposed cohort | Selection of non-exposed | Ascertainment of exposure | Outcome not present at start |               | Assessment of outcome | Adequate follow-up lenght | Adequacy of follow-up |         |
| Erho 2013 [12]                                                                                                                                                                                       | *                                     |                          | *                         |                              |               | *                     | *                         | **                    | 6/9     |
| Karnes 2013 [13]                                                                                                                                                                                     | *                                     |                          | *                         |                              |               | *                     | *                         | **                    | 6/9     |
| Cooperberg 2014 [14]                                                                                                                                                                                 | *                                     |                          | *                         |                              |               | *                     | *                         | **                    | 6/9     |
| Ross 2014 [15]                                                                                                                                                                                       | *                                     |                          | *                         |                              |               | *                     | *                         | **                    | 6/9     |
| Den 2014 [16]                                                                                                                                                                                        | *                                     |                          | *                         |                              |               | *                     | *                         | **                    | 6/9     |
| Klein 2015 [17]                                                                                                                                                                                      | *                                     |                          | *                         |                              |               | *                     | *                         | **                    | 6/9     |
| Ross 2016 [18]                                                                                                                                                                                       | *                                     |                          | *                         |                              |               | *                     | *                         | **                    | 6/9     |
| Den 2015 [19]                                                                                                                                                                                        | *                                     |                          | *                         |                              |               | *                     | *                         | **                    | 6/9     |
| Cuzick 2011 [23]                                                                                                                                                                                     | *                                     |                          | *                         |                              |               | *                     | *                         | **                    | 6/9     |
| Bishoff 2014 [24]                                                                                                                                                                                    | *                                     |                          | *                         |                              |               | *                     | *                         | **                    | 6/9     |
| Freedland 2013 [25]                                                                                                                                                                                  | *                                     |                          | *                         |                              |               | *                     | *                         | **                    | 6/9     |
| Cuzick 2015 [27]                                                                                                                                                                                     | *                                     |                          | *                         |                              |               | *                     | *                         | **                    | 6/9     |
| Cooperberg 2013 [26]                                                                                                                                                                                 | *                                     |                          | *                         |                              |               | *                     | *                         | **                    | 6/9     |
| Canter 2020 [28]                                                                                                                                                                                     | *                                     |                          | *                         |                              |               | *                     | *                         | **                    | 6/9     |
| Klein 2014 [34]                                                                                                                                                                                      | *                                     |                          | *                         |                              |               | *                     | *                         | **                    | 6/9     |
| Van Den Eeden 2018 [36]                                                                                                                                                                              | *                                     |                          | *                         |                              |               | *                     | *                         | **                    | 6/9     |
| Brooks 2021 [37]                                                                                                                                                                                     | *                                     |                          | *                         |                              |               | *                     | *                         | **                    | 6/9     |
| Covas Moschovas 2021 [38]                                                                                                                                                                            | *                                     |                          | *                         |                              |               | *                     | *                         | **                    | 6/9     |
| Cullen 2021 [35]                                                                                                                                                                                     | *                                     |                          | *                         |                              |               | *                     | *                         | **                    | 6/9     |
